# Supplementary material for: Discovery of a new family of chromium ethylene polymerisation catalysts using high throughput screening methodologyElectronic supplementary information (ESI) available: experimental section. See http://www.rsc.org/suppdata/cc/b2/b202037h/
Source: Royal Society of Chemistry journal article supplement (doi:10.1039/b202037h), 2002-04-16
Supplement: b202037h.doc [file b202037h.doc]

Supplementary Material (ESI) for Chemical Communications

This journal is © The Royal Society of Chemistry 2002

Synthesis

NMR Assignments

*N-phenyl 3-(9-anthracenyl)-2-hydroxybenzyl imine* (**2A)** *[N-Phenyl anthracenyl-salicylaldimine]*: To a slurry of anthracenyl-salicylaldehyde **A** (0.50 g, 1.676 mmoles) suspended in 10 mls of ethanol was added aniline (0.50 mls, excess) and a drop of formic acid. The slurry was stirred overnight. The pale yellow product collected by filtration and washed with ethanol before being dried in a vacuum oven at 60oC. Yield 0.48 g (77%).

1H -NMR  13.65(s, 1H, OH), 8.822(s, 1H, CHN), 8.549(s, 1H, Ha), 8.079(d, 2H *J* = 7.7 Hz, Anth-H), 7.719(d, 2H *J* = 7.93 Hz, Anth-

H), 7.636(dd, 1H *J* = 7.7 & 1.7 Hz, Ph-H), 7.35 7.51(brm, Anth-H and Ph), 7.24(brm, Ph Ph-H), 7.194(t, 1H *J* = 7.6 Hz, Hc).

13C{1H}-NMR  162.40, 159.56, 148.11, 139.92, 136.41, 132.36, 131.58, 130.44, 129.44, 128.63, 127.07, 126.49, 125.60, 125.13,

121.17, 119.47, 119.02.

Ir(KBr disk) 3500br, 3048w, 3026w, 2700br, 1943w, 1614s, 1576s, 1491m, 1479m, 1440s, 1409m, 1354m, 1313w, 1295m, 1266m,

1218w, 1198s, 1169sh, 1162m, 1148w, 1077m, 1021m, 1013m, 981m, 967w, 909m, 884m, 857m, 846m, 792s, 778w, 770m, 755s,

736s, 694s, 687sh, 636m, 621w, 590m, 562m, 533m, 509w, 494w, 472w.

MS(CI-ve) (m/z) 373(M-H- 100%)

C27H19NO (373.46): Calc. C 86.84, H 5.13, N 3.75; Found C 86.71, H 4.99, N 3.69.

*N-isopropyl 3-(9-anthracenyl)-2-hydroxybenzyaldimine* (**25A**) *[N-isopropyl anthracenyl-salicylaldimine]*: Yield 0.36 g (63%).

1H -NMR  14.017(s, 1H, OH), 8.527(s, 1H, H5), 8.515(s, 1H, CHN), 8.065(brd, 2H *J* = 7.7 Hz, Anth-H), 7.699(brd, 2H *J* = 7.7 Hz,

Anth-H), 7.52-7.34(brm, 6H, H2&3 and Hb&c), 7.105(t, 1H *J* = 7.5 Hz, Hc), 3.583(sept, 1H *J* = 6.4 Hz, *i*Pr-CH), 1.245(d, 6H *J* = 6.4

Hz, *i*Pr-Me).

13C{1H}-NMR  162.06, 159.83, 135.27, 132.81, 131.56, 131.11, 130.42, 128.53, 126.84, 126.61, 126.16(?), 125.43, 125.02, 118.98,

118.21,59.84, 24.13.

Ir(KBr disk) 3450br, 3049m, 2995w, 2969m, 2955m, 2926w, 2867m, 2856m, ≈2700br, 1946w, 1926w, 1626s, 1603s, 1483w, 1446s,

1408m, 1383m, 1357m, 1311m, 1293m, 1267m, 1218m, 1148s, 1073w, 1019w, 1013w, 976w, 953w, 912w, 891m, 871w, 857m, 846m,

794m, 786w, 754s, 736s, 681w, 636m, 589w, 557w, 527w, 492w.

MS(CI-ve) (m/z) 339(M-H-, 100%)

C24H21NO (339.44): Calc. C 84.92, H 6.24, N 4.13; Found C 84.88, H 6.23, N 4.01.

*N-(2-pyridyl)-methyl 3-(9-anthracenyl)-2-hydroxybenzyl imine* (**32A)** *[N-(2-pyridyl)-methyl anthracenyl-salicylaldimine]*: To a slurry of anthracenyl-salicylaldehyde **A** (0.50 g, 1.676 mmoles) suspended in 10 mls of ethanol was added 2-aminomethylpyridine (0.50 mls, excess) and a drop of formic acid. The slurry was stirred at reflux overnight then cooled to RT. The yellow product was collected by filtration and washed with ethanol before being dried in a vacuum oven at 60oC. Yield 0.44 g 67.5(%).

1H -NMR (400 MHz, CDCl3) 4.935(s, 2H, He), 7.142(2 cooincident t’s, 2H *J* ≈ 7.5 Hz, Hc & Hh), 7.291(d, 1H *J* = 7.8 Hz, Hf), 7.34-

7.41(m, 3H, H2 & Hd), 7.452(t, 2H *J* = 7.8 Hz, H3), 7.536(dd, 1H *J* 7.7 & 1.6 Hz, Hb), 7.574(dt, 1H *J* = 7.7 & 1.8 Hz, Hg), 7.681(d, 2H *J*

= 8.8 Hz, H1), 8.054(d, 2H *J* = 8.5 Hz, H4), 8.521(s, 1H, Ha) overlapping with 8.531(d, 1H *J* = 8.6 Hz, Hi), 8.719(s, 1H, H5), 13.577(s,

1H, OH).

13C{1H} NMR (100 MHz, CDCl3) 65.1, 118.7, 119.0, 122.2, 122.4, 125.1, 125.5, 126.5, 126.6, 127.0, 128.6, 130.4, 131.5, 131.7, 132.5,

135.8, 136.8, 149.4, 157.7, 159.4, 166.7.

Ir(KBr disk) 3054w, 3028sh, 2886sh, 2961w, 2886w, 1947w, 1914w, 1803w, 1638s, 1591s, 1571m, 1478w, 1436s, 1451s, 1343w,

1311w, 1290m, 1269m, 1210w, 1145m, 1058w, 998w, 861w, 746s, 640s, 606m, 504m, 472m.

MS(CI -ve) (m/z) 388 (M-H- 75%), 296 (M-CH2Py- 100%).

C27H20N2O (388.47): Calc. C 83.48, H 5.19; Found C, H.

*N-(2-pyridyl)-methyl 3-(9-triptycyl)-2-hydroxybenzylimine* (**32D)** *[N-(2-pyridyl)-methyl triptycyl-salicylaldimine]*: To a slurry of triptycyl-salicylaldehyde **D** (0.50 g, 1.33 mmoles) suspended in 10 mls of ethanol was added 2-aminomethylpyridine (0.50 mls, excess) and a drop of formic acid. The slurry was stirred at reflux overnight then cooled to RT. The yellow product was collected by filtration and washed with ethanol before being dried in a vacuum oven at 60oC. Yield 0.48 g 77.7(%).

1H-NMR (400 MHz, CDCl3) 3 *J* = 7.7 & 1.3 Hz, H2), 6.976(dt, 3H, *J* = 7.3 & 1.0 Hz,

H3), 7.167(dd, 1H *J* = 7.4 & 1.3 Hz, Hh), 7.223(t, 1H *J* = 7.7 Hz, Hc), 7.255-7.294(m, 4H, H1 & Hf), 7.412(dd, 3H *J* = 7.2 & 1.1 Hz, H4),

7.564(dd, 1H *J* = 7.5 & 1.4 Hz, Hb), 7.606(dt, 1H *J* = 7.7 & 1.8 Hz, Hg), 8.511(dd, 1H *J* = 7.9 & 1.4 Hz, Hd), 8.552(brd, 1H *J* = 4.5 Hz,

Hi), 8.722(s, 1H, Ha), 13.989(s, 1H, OH).

13C{1H}-NMR (100 MHz, CDCl3)  55.2, 59.1, 65.0, 118.1, 119.8, 122.3, 122.4, 123.4, 124.3, 124.5, 124.8, 125.0, 131.9, 135.2, 136.9,

145.5, 146.2, 149.3, 157.6, 161.3, 166.9.

Ir(KBr disk) 3450br, 3074w, 3050m, 3006m, 2922w, 2878m, ≈ 2640br, 1924w, 1623s, 1589s, 1571sh, 1475m, 1447s, 1409m, 1381m,

1358m, 1324m, 1295m, 1264m, 1231m, 1219m, 1168w, 1145w, 1099w, 1080m, 1038m, 1013m, 994w, 911w, 892m, 846s, 795m,

784sh, 778m, 771m, 751s, 742s, 684w, 650sh, 642m, 615w, 581w, 557w, 519sh, 511w, 481m.

MS(CI-ve) (m/z) 464 (M+ 85%), 372 (M-CH2Py- 100%).

C33H24N2O (464.57): Calc. C 85.32, H 5.21, N 6.03; Found C 85.36, H 5.15, N 5.95.

*(N-(2-pyridyl)-methyl triptycyl-salicylaldimino)chromium(III) dichloride* (**3d)**: Ligand **32D** (0.50 g, 1.105 mmoles)and *p*-tolylCrCl2(thf)3 (0.41 g, 1.105 mmoles) were reacted by dissolving in 20 mls of thf. A brown solid precipitated almost immediately. The slurry was stirred for 1 hour and the solids recovered by filtration and washed with 2 x 10 mls of thf. Yield 0.586 g 90.5(%).

Ir(KBr disk) 3435br, 3067m, 3005m, 2958m, 2887w, ≈2500br, 1950w, 1913w, 1630s, 1599s, 1571sh, 1473sh, 1453s, 1435s, 1377w,

1330w, 1288m, 1267m, 1147m, 1124w, 1100w, 1083w, 1050m, 1036m, 1019sh, 998w, 944w, 914w, 902w, 859w, 842w, 790w, 757s,

746s, 669w, 646s, 606m, 587w, 563w, 504m, 471w.§

FAB-MS (m/z) 1137(L2Cr2Cl3+, 15%), 550(M-Cl+, 100%), 513(LCr+, 80%)

C33H23N2OCrCl2 (586.47): Calc. C 67.59, H 3.95, N 4.78; Found C 67.51, H 3.97, N 4.71.

Catalysis

Activated Catalyst Solution Formation: A mixture of the required ligand (0.030 mmoles) and *p*-tolylCrCl2(thf)3 (12.9 mg, 0.030 mmoles) were dissolved in 10 mls of dry degassed toluene and allowed to stir for 5 minutes, the initial yellow colour turned a brown yellow. The solvent was removed under vacuum and the brown residue slurried in 26.2 mls of dry degassed toluene. The pro-catalyst was activated by the addition of MAO (3.8 mls, 1.6 M, 6.0 mmoles) and the slightly darker solution allowed to stir for 5 minutes.

Schlenk Test: A 5 ml aliquot (5 moles) of the activated catalyst solution was transferred to a Schlenk containing 95 mls of dry degassed toluene. The vessel was sealed and evacuated. The vessel was placed under 1 Bar of ethylene pressure and allowed to react for 1 hour. The solution was deactivated by depressurising and addition of 100 mls of methanol containing 2 mls of dilute HCl. The polymer was recovered by filtration, washed with methanol and dried in a vacuum oven at 60oC overnight. The combined filtrates were collected and the solvent removed on a Rot-Vap. The residue was dissolved in 50 mls of toluene and filtered through 2 cm of alumina and the alumina was washed with 2 x 10 mls of toluene. To the combined filtrates was added 1 ml of nonane and the sample submitted for GC analysis. The combined catalytic data for tests using ligands 6-9 are collected in Table 1.

Large Reactor: An automated 1 litre Buchi reactor was prepared with 400 mls of isobutane at the required temperature and pressure of ethylene. The reactor was scavenged with 1.25 mls of 1.6 M MAO (2.0 mmoles) solution in toluene. A 5 ml aliquot (5 moles) of the activated catalyst solution was transferred to the large reactor and the ethylene uptake monitored for the catalyst run. After 60 minutes the isobutane was vented and the polymer collected and dried in a vacuum oven at 60oC overnight.

High Throughput Screen Procedure: The ligand (5 mol) was mixed with a solution of *p*-(tolyl)CrCl2(THF)3 (5 mol in 1.5 mL toluene), and MAO was added (0.5 mL of a 1.8M solution in toluene, 180 eq.) The solution was then stirred under an ethylene atmosphere (1 bar) for 15 min; the activity was determined by polymer yield.
